# Supplementary material
Source: HighWire-hosted journal article supplement (https://ebmtp.com/highwire/filestream/136542/field_highwire_adjunct_files/0/lemmends_762.pdf)
Supplement: lemmends_762.pdf [file lemmends_762.pdf]

# 血管内再灌注的疗效与动脉闭塞部位的相关性

Robin Lemmens, MD, PhD; Scott A. Hamilton, PhD; David S. Liebeskind, MD; Tom A. Tomsick, MD;  
Andrew M. Demchuk, MD; Raul G. Nogueira, MD; Michael P. Marks, MD; Reza Jahan, MD; Jan Gralla, MD; Albert J. Yoo, MD;  
Sharon D. Yeatts, MS, PhD; Yuko Y. Palesch, PhD; Jeffrey L. Saver, MD; Vitor M. Pereira, MD; Joseph P. Broderick, MD;  
Gregory W. Albers, MD; Maarten G. Lansberg, MD, PhD; For the DEFUSE 2, IMS III, STAR, and SWIFT trialists

**目的：**旨在评估再灌注和卒中后临床转归改善间的相关性是否因动脉硬化闭塞病灶（arterial occlusive lesion, AOL）的部位不同而存在差异。

**方法：**为比较再灌注与颈内动脉（internal carotid artery, ICA）、近端大脑中动脉（proximal middle cerebral artery, MCA）（M1）和远端 MCA（M2/3/4）闭塞患者临床转归间相关性的强度，我们对多项研究的数据进行了汇总，这些数据来自于 SWIF（Solitaire With the Intention for Thrombectomy, SWIFT）研究、STAR（Solitaire FR Thrombectomy for Acute Revascularisation, STAR）研究、DEFUSE 2（Diffusion and Perfusion Imaging Evaluation for Understanding Stroke Evolution Study 2, DEFUSE 2）研究和 IMS III（Interventional Management of Stroke Trial IMS III）研究。

**结果：**在纳入的 710 例患者中，161 例的 AOL 部位为 ICA、389 例为近端 MCA、160 例为远端 MCA（M2 = 131、M3 = 23、M4 = 6）。在 ICA 闭塞患者 [ 比值比（odds ratio, OR）3.5, 95% 可信区间（confidence interval, CI）1.7~7.2] 以及近端 MCA 闭塞患者（OR 6.2, 95% CI 3.8~10.2）中，再灌注与功能转归改善 [ 改良版 Rankin 量表（modified Rankin Scale, mRS）评分为 0~2] 相关，但在远端 MCA 闭塞患者（OR 1.4, 95% CI 0.8~2.6）中未发现此类相关性。在 M2 段闭塞患者（远端 MCA 闭塞队列的一个亚组）中，再灌注与功能转归极佳相关（mRS 0~1; OR 2.2, 95% CI 1.0~4.7）。

**结论：**ICA 和近端 MCA 闭塞患者中的血管内再灌注与良好临床转归间的相关性显著性高于远端 MCA 闭塞患者。关于远端 MCA 闭塞患者血管内治疗效果方面的随机对照试验资料十分有限，此项研究结果强调了未来血管内治疗试验纳入此类亚组患者的必要性。 *Neurology*® 2016;86:762-770

（陈康宁 审校）
